# Supplementary material for: Neural Correlates of Amusia in Williams Syndrome
Source: Brain Sci. 2014 Nov 21;4(4):594–612. doi: 10.3390/brainsci4040594 (PMC4279144; doi:10.3390/brainsci4040594)
Supplement: Supplementary File 1 [file brainsci-04-00594-s001.xlsx]

## Sheet: Sheet1
Supplementary Table S1. Data for individual participants.
Subject	Age	Sex	Age began music lessons	Hours/day play music	Hours/day listen to music	Cumulative Years Individual Music Lessons	Number of Lesson Types	Handedness	Sensitivity to Sound Characteristics	Sensitivity to Specific Sounds	KBIT FSIQ	DTT score	white matter volume of left pars orbitalis	white matter volume of right pars parbitalis	white matter volume of left STG	white matter volume of right STG	white matter volume of left TTG	white matter volume of right TTG	gray matter volume left pars orbitalis	gray matter volume right pars orbitalis	gray matter volume left STG	gray matter volume right STG	gray matter volume left TTG	gray matter volume right TTG	FA right inferior SLF	FA left inferior SLF	FA right superior SLF	FA left superior SLF
1	24	m	11	1.5	1.5	11.5	6	1	19	37	91	25	733	1460	6269	5875	892	443	2416	3865	12875	12472	1228	941	0.4109	0.352	0.5092	0.5865
2	22	m	11	1	8	12	3	-1	20	34	91	20	814	1073	6150	5016	990	508	2182	3094	12039	9786	1239	961	0.4151	0.4563	0.4152	0.4497
3	34	m	8	1.5	3	22	6	-0.77	25	46	84	25	939	1012	7502	6073	833	627	2053	2676	12291	10511	1040	1026	0.4875	0.4912	0.5022	0.4932
4	32	f		5	6	0	1	1	24	64	53	13	873	886	6769	5670	733	628	1837	2119	11502	9729	1062	828	0.3865	0.369	0.3874	0.4824
5	38	m	10	2	3	11	5	1	10	30	70	22	945	1281	6448	6268	898	484	2797	3229	12399	13657	1632	980	0.4704	0.546	0.4383	0.4054
6	23	m		0.75	3	0	1	1	20	63	86	12	692	897	5258	4165	738	379	2209	2587	10691	9692	1065	698	0.3726	0.3848	0.4396	0.4517
7	28	f	15	0	1.5	2	2	0.48	14	26	43	17	517	696	3427	3341	507	287	1431	1823	7273	7814	702	482	0.3854	0.3718	0.3297	0.4258
8	32	f		0	1	0	0	0.91	14	44	57	20	801	902	4799	4051	587	456	2393	2611	9900	9823	1120	972	0.4454	0.3516	0.4009	0.4265
9	34	m	10	1	1	21.5	3	1	15	78	46	16	922	1199	8523	7741	1108	612	2277	3113	13702	14954	2122	1499	0.3761	0.4471	0.3587	0.419
10	22	m	12	6	6	11	4	1	29	102	46	22	889	1119	6471	5602	695	439	2322	3081	13616	12170	1598	1069	0.4898	0.4322	0.5316	0.5691
11	18	f	14	0.71	0.5	4	4	1	19	55	70	20	715	901	5541	5378	683	494	2312	3154	10128	12922	1526	1157	0.4196	0.3525	0.4729	0.5159
12	16	f	11	2	2	10	4	1	25	65	58	24	678	932	5708	4740	552	451	2258	2747	12097	11856	1213	1083	0.4594	0.4124	0.3961	0.441
13	22	m	19	1	1	3	3	1	22	63	79	26	961	1098	8213	8362	1028	551	2555	2771	14829	15656	1477	1292	0.4569	0.4257	0.4331	0.5607
14	16	m	11	0	4	1	4	0.82	22	50	93	23	975	1359	6645	5268	684	581	2663	4038	13449	11548	1258	870	0.5028	0.5051	0.4939	0.504
15	16	m	11	0	1	1	3	-0.5	13	24	68	20	823	1091	5972	4674	717	350	2581	2927	11947	10615	1057	873	0.4745	0.3867	0.378	0.5199
16	48	m	6	1	2	46	6	0.9	5	29	69	26	725	1109	5982	6263	691	546	1919	2814	10657	11861	1054	1127	0.4292	0.3986	0.4641	0.4812
17	18	m	15	1	2	0.5	3	0.33	11	33	91	24	734	1274	6431	5234	584	528	2590	4269	12679	12047	1353	811	0.4636	0.4321	0.4179	0.5057
